# Supplementary material for: Efficacy of Tenofovir-Based Combination Therapy versus Tenofovir Monotherapy in Chronic Hepatitis B Patients Presenting with Suboptimal Responses to Pretreatment: A Meta-Analysis
Source: Hindawi journal article supplement (doi:10.1155/2016/7214020), 2016-01-01

**Supplementary Table 1. The quality of studies assessed by the revised Jadad or NOS.**

| Study                     | Randomization | Allocation concealment | Blinding | Dropout | Jadad score |
|---------------------------|---------------|------------------------|----------|---------|-------------|
| Berg et al. <sup>14</sup> | 2             | 2                      | 2        | 1       | 7           |
| Liaw et al. <sup>15</sup> | 2             | 1                      | 1        | 1       | 5           |
| Fung et al. <sup>16</sup> | 2             | 1                      | 2        | 1       | 6           |
| Lim et al. <sup>17</sup>  | 2             | 2                      | 0        | 1       | 5           |
| Yoo et al. <sup>18</sup>  | 2             | 2                      | 0        | 1       | 5           |

  

| Study                     | Selection | Comparability | Outcomes | NOS score |
|---------------------------|-----------|---------------|----------|-----------|
| Seto et al. <sup>19</sup> | 3         | 1             | 3        | 7         |
| Lee et al. <sup>22</sup>  | 2         | 1             | 2        | 5         |
| Lu et al. <sup>20</sup>   | 3         | 1             | 2        | 6         |
| Choi et al. <sup>21</sup> | 3         | 1             | 2        | 6         |

**Supplementary Figure 1. Funnel plots for some outcomes.** A) 24-week virological suppression; B) 48-week virological suppression; C) HBV DNA reduction; D) HBeAg loss.

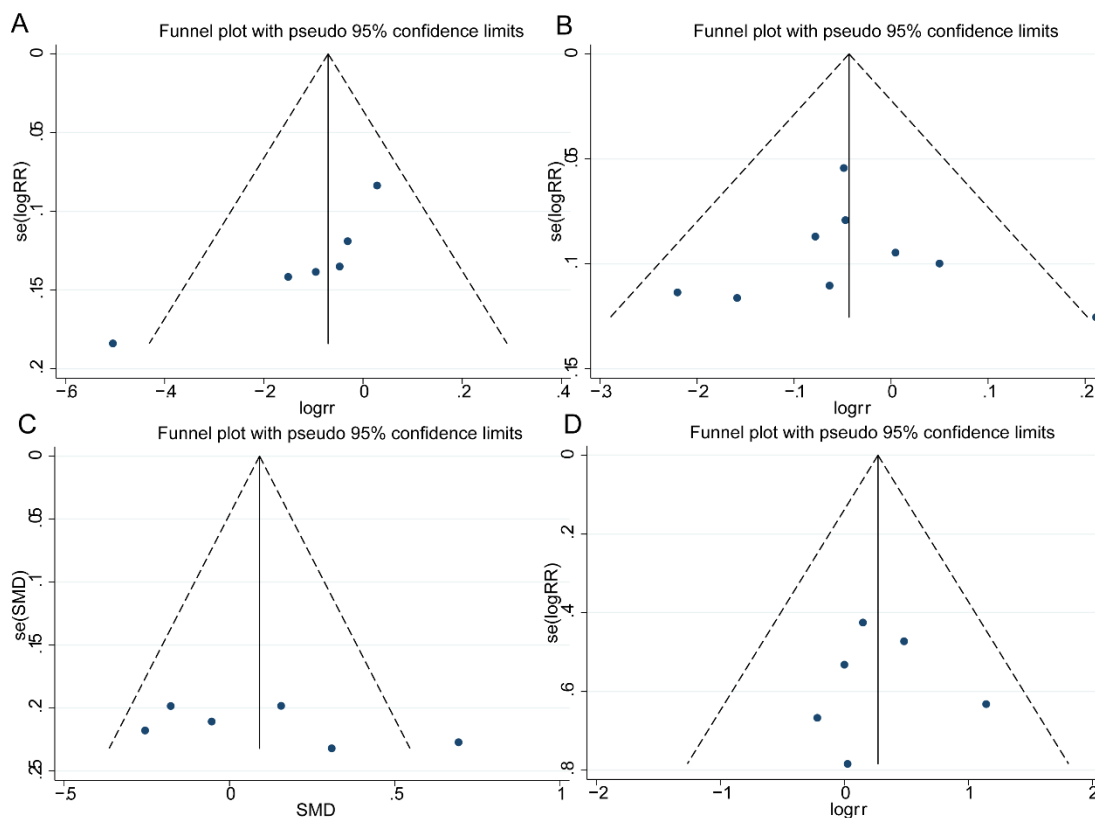

**Supplementary Figure 2. Forest map of summary estimate for comparison of serum HBV DNA reduction between TDF-based combination therapy and monotherapy groups.**

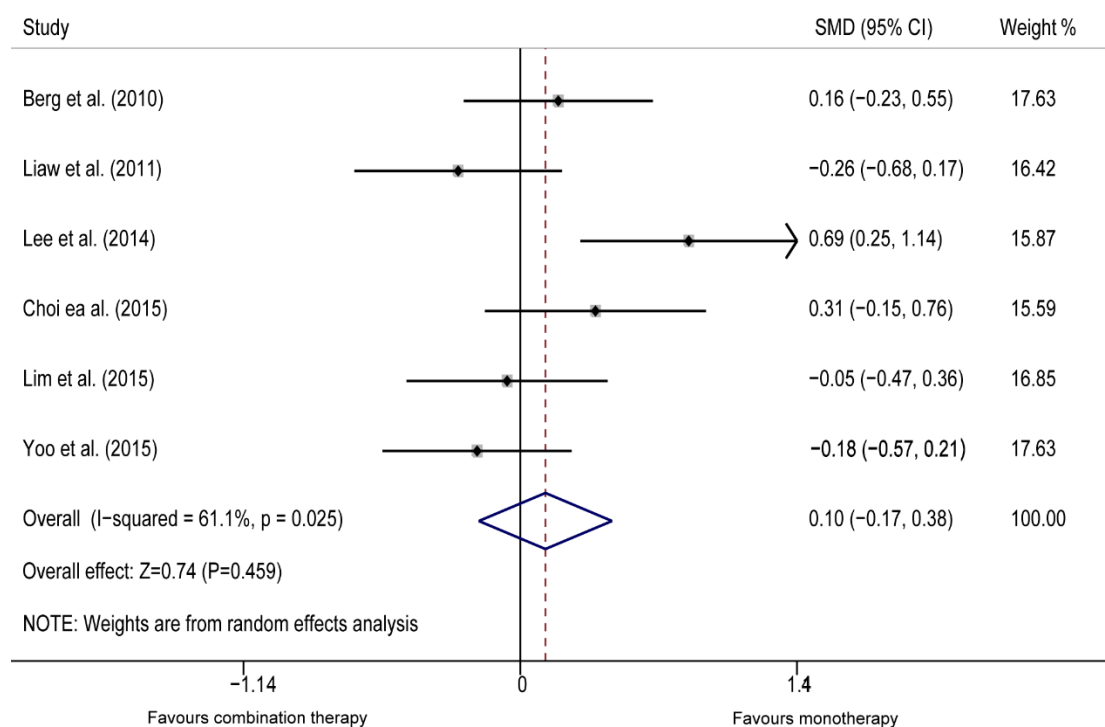

Supplement: f1 [file 7214020.f1.pdf]
